# Supplementary material
Source: PubMed Central journal article supplement (PMC8177692)
Supplement: NIHMS1704457-supplement-sm.pdf [file NIHMS1704457-supplement-sm.pdf]

Supplemental Table S1: Consolidated Framework for Implementation Research (CFIR) Domains and Constructs\*

|            |                                                                                                                                                                                              |
|------------|----------------------------------------------------------------------------------------------------------------------------------------------------------------------------------------------|
| Domain     | Intervention Characteristics : “The intervention is often complex and multi-faceted, with many interacting components.”                                                                      |
| Constructs | Intervention Source                                                                                                                                                                          |
|            | Evidence Strength & Quality                                                                                                                                                                  |
|            | Relative Advantage                                                                                                                                                                           |
|            | Adaptability                                                                                                                                                                                 |
|            | Trialability                                                                                                                                                                                 |
|            | Complexity                                                                                                                                                                                   |
|            | Design Quality & Packaging                                                                                                                                                                   |
|            | Cost                                                                                                                                                                                         |
| Domain     | Outer Setting: “The outer setting includes the economic, political, and social context within which an organization resides.”                                                                |
| Constructs | Patient Needs & Resources                                                                                                                                                                    |
|            | Cosmopolitanism                                                                                                                                                                              |
|            | Peer Pressure                                                                                                                                                                                |
|            | External Policy & Incentives                                                                                                                                                                 |
| Domain     | Inner Setting: “The inner setting includes features of structural, political, and cultural contexts through which the implementation process will proceed.”                                  |
| Constructs | Structural Characteristics                                                                                                                                                                   |
|            | Networks & Communications                                                                                                                                                                    |
|            | Culture                                                                                                                                                                                      |
|            | Implementation Climate                                                                                                                                                                       |
|            | Tension for Change                                                                                                                                                                           |
|            | Compatability                                                                                                                                                                                |
|            | Relative Priority                                                                                                                                                                            |
|            | Organizational Incentives and Rewards                                                                                                                                                        |
|            | Goals and Feedback                                                                                                                                                                           |
|            | Learning Climate                                                                                                                                                                             |
|            | Readiness for Implementation                                                                                                                                                                 |
|            | Leadership Engagement                                                                                                                                                                        |
|            | Available Resources                                                                                                                                                                          |
|            | Access to Knowledge and Information                                                                                                                                                          |
| Domain     | Characteristics of Individuals: “Individuals have agency; they make choices and can wield power and influence on others with predictable or unpredictable consequences for implementation .” |
| Constructs | Knowledge & Beliefs about the Intervention                                                                                                                                                   |
|            | Self-efficacy                                                                                                                                                                                |
|            | Individual Stage of Change                                                                                                                                                                   |
|            | Individual Identification with Organization                                                                                                                                                  |
|            | Other Personal Attributes                                                                                                                                                                    |

|            |                                                                                                                                                                          |
|------------|--------------------------------------------------------------------------------------------------------------------------------------------------------------------------|
| Domain     | Process: “Successful implementation usually requires an active change process aimed to achieve individual and organizational level use of the intervention as designed.” |
| Constructs | Planning                                                                                                                                                                 |
|            | Engaging                                                                                                                                                                 |
|            | Opinion Leaders                                                                                                                                                          |
|            | Formally Appointed Internal Implementation Leaders                                                                                                                       |
|            | Champions                                                                                                                                                                |
|            | External Change Agents                                                                                                                                                   |
|            | Executing                                                                                                                                                                |
|            | Reflecting & Evaluating                                                                                                                                                  |

\*All domain descriptions are taken from: Damschroder LJ, Aron DC, Keith RE, Kirsh SR, Alexander JA, Lowery JC. Fostering implementation of health services research findings into practice: a consolidated framework for advancing implementation science. *Implementation Science* 2009;4. Additional information about the using the CFIR constructs to evaluate an implementation process or design an implementation study can be found at [www.cfirguide.org](http://www.cfirguide.org).
